# Supplementary material
Source: PubMed Central journal article supplement (PMC2430374)
Supplement: 0803261105_Supplemental_PDF.pdf [file 0803261105_Supplemental_PDF.pdf]

# Supporting Information

Perry et al. 10.1073/pnas.0803261105

## SI Text: Fine Mapping of 129/SvJ Boundaries in Congenic *Girk4*<sup>-/-</sup> Mice

Despite extensive backcrossing, a significant differential chromosome segment of  $\approx 9$  cM {calculated based on the formula  $[200 \times (1 - 2 - N)/N]$ , where  $N$  is the backcross generation number (1)} containing genetic content from the 129S1/SvImJ strain is predicted to flank the *Girk4* null mutation. Strain-dependent polymorphisms present in the differential chromosome segment could shape or even cause phenotypes seen in *Girk4*<sup>-/-</sup> mice. To define the size of 129S1/SvImJ-based sequence flanking the *Girk4* null mutation, we probed genomic DNA from *Girk4*<sup>-/-</sup> mice and wild-type counterparts using

microsatellite markers and SNP markers. The *Girk4* (*Kcnj5*) gene is located on mouse chromosome 9 (MMU9: 32.1 Mb). Nineteen different microsatellites on MMU9 between 21.7 and 37.0 Mb were tested for strain-dependent differences by using PCR amplification, as described (2). Of these, only three were polymorphic between C57BL/6J and 129/SvImJ strains: D9Mit297, 33.7 Mb; D9Mit224, 36.4 Mb; and D9Mit247, 36.7 Mb). Restriction fragment length polymorphism assays were also developed for four single-nucleotide polymorphic markers (rs33651098, rs33777057, rs13480121, and rs3720858) located between 29.6 and 34.1 Mb. Primers and restriction enzymes in this analysis are detailed in [Table S1](#). A list of genes found within the differential chromosome segment can be found in [Table S2](#).

1. Silver L (1995) *Mouse Genetics: Concepts and Applications* (Oxford Univ Press).
2. Farber CR, Medrano JF (2007) Fine mapping reveals sex bias in quantitative trait loci affecting growth, skeletal size and obesity-related traits on mouse chromosomes 2 and 11. *Genetics* 175:349–360.

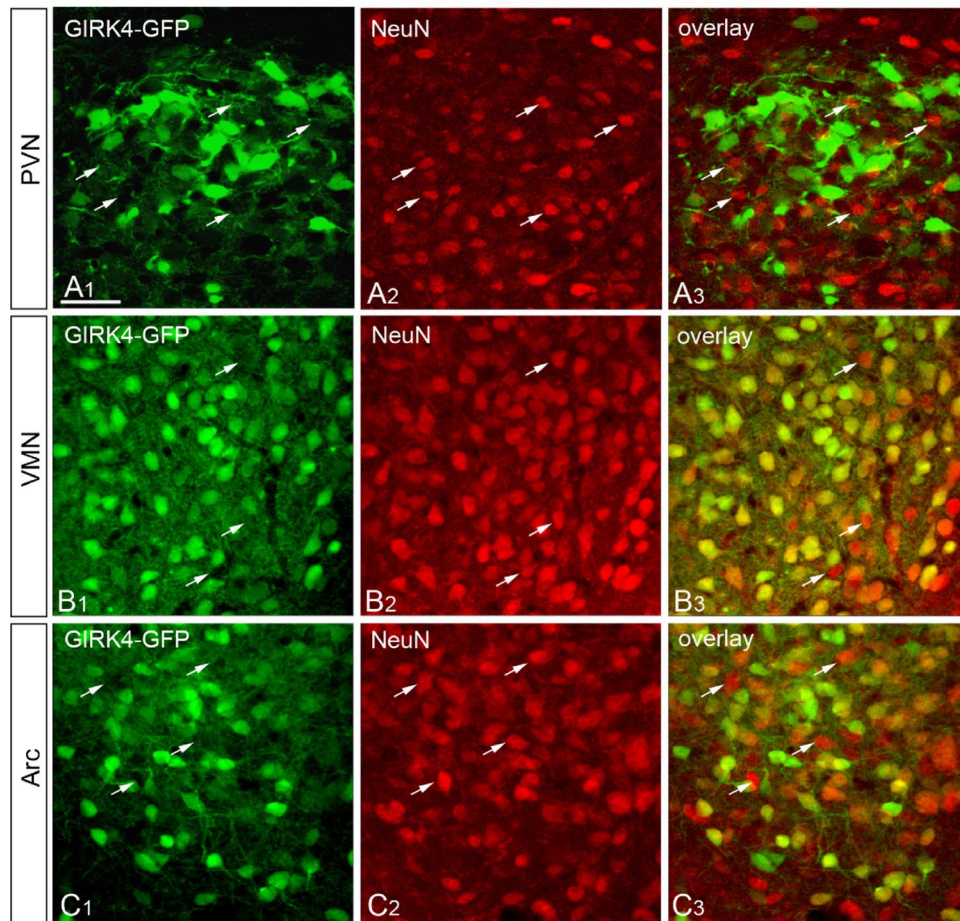

**Fig. S1.** Overlap between EGFP expression and the neuronal marker NeuN in the VMN, PVN, and posterior ARC from the *Tg(Kcni5-EGFP)49sat* mouse. Neurons were labeled with a NeuN antibody (1:1,000; Chemicon International) and a Cy3-conjugated goat anti-mouse secondary antibody (1:500; Jackson ImmunoResearch). (Scale bar: 35  $\mu\text{m}$ .)

**Table S1. PCR primers and restriction enzyme sites used for fine mapping**

| SNP ID     | Position (MMU9), bp | Primer sequence, 5' to 3' |                         | Enzyme  |
|------------|---------------------|---------------------------|-------------------------|---------|
|            |                     | Forward                   | Reverse                 |         |
| rs33651098 | 29690892            | CAGCAGCAGAAACAGCAGACT     | AGGCCTTTGTAGTGTGTTTATGG | BsrI    |
| rs33777057 | 34997582            | CTTGATTTTGAGCAGACTAATGCGC | GGTAAGTGCTGCCCCAAAACAA  | FspI    |
| rs13480120 | 30229441            | GATGGCTGTAGACAGTGGGGC     | ATTTGGTCTCCCTGGGGACCTA  | HaeIII  |
| rs3720858  | 34000554            | TCTAAAGTTCTATGTCCATCCAAA  | AGGAGTAGGCAGAAGGTCTGGAT | Tsp509I |

SNP markers used for the fine mapping of the differential genomic segment of MMU9 derived from the 129/SvImJ mouse strain. Primer sequences and restriction enzymes used for restriction fragment length polymorphism (RFLP) analysis are listed. All PCRs were run in the presence of 2 mM MgCl<sub>2</sub> and with 55°C annealing temperatures.

**Table S2. Genes of 129/SvimJ origin on MMU9 that flank the *Girk4* null mutation**

| Gene            | GenBank accession no. | Name(s)                                                                    | Function(s)                             | Position     |
|-----------------|-----------------------|----------------------------------------------------------------------------|-----------------------------------------|--------------|
| <i>Hnt</i>      | NM_172290             | Neurotrimin                                                                | Synaptogenesis                          | 28803548(-)  |
| <i>Snx19</i>    | NM_028874             | Sortin nexin 19                                                            | Insulin secretion                       | 30234913(+)  |
| <i>Adamts15</i> | NM_001024139          | disintegrin-like and metallopeptidase with thrombospondin type 1 motif, 15 | Metalloendopeptidase                    | 30706739(-)  |
| <i>Adamts8</i>  | NM_013906             | disintegrin-like and metallopeptidase with thrombospondin type 1 motif, 8  | Metalloendopeptidase                    | 30750147(+)  |
| <i>Zbtb44</i>   | NM_172765             | Btbd15                                                                     | —                                       | 30838228(+)  |
| <i>St14</i>     | NM_011176             | Suppressor of tumorigenicity 14, matriptase                                | Serine protease                         | 30896174(-)  |
| <i>Aplp2</i>    | NM_001102456          | Apolipoprotein 2                                                           | Synaptogenesis                          | 30957141(-)  |
| <i>Prdm10</i>   | NM_001080817          | PR domain containing 10                                                    | —                                       | 31122691 (+) |
| <i>Nfrkb</i>    | NM_172766             | Nuclear factor related to kappa B binding protein                          | T cell activation                       | 31193796(+)  |
| <i>Tmem45b</i>  | NM_144936             | Transmembrane protein 45b                                                  | —                                       | 31233780(-)  |
| <i>Barx2</i>    | NM_013800             | Bar-like homeobox 2                                                        | Hair follicle remodeling                | 31653628(-)  |
| <i>Grit</i>     | NM_177379             | RICS, p250GAP, p200RhoGAP                                                  | Neurite morphology, growth              | 32015784(+)  |
| <i>Kcnj5</i>    | NM_010605             | GIRK4, Kir3.4                                                              | Heart rate regulation                   | 32122367(-)  |
| <i>Kcnj1</i>    | NM_019659             | Kir1.1, ROMK, ROMK-2                                                       | Renal absorption (K <sup>+</sup> ,NaCl) | 32201569(+)  |
| <i>Fli1</i>     | NM_008026             | Friend leukemia integration 1, EWSR2, Sic1                                 | Induction of erythroleukemia            | 32229792(-)  |
| <i>Ets1</i>     | NM_011808             | E26 avian leukemia oncogene 1, Tpl1                                        | Transcription factor                    | 32503626(+)  |
| <i>Kirrel3</i>  | NM_026324             | Kin of IRRE like 3, NEPH2, SST4                                            | Synapse formation                       | 34296315(+)  |
| <i>St3gal4</i>  | NM_009178             | ST3 $\beta$ -galactosidase $\alpha$ -2,3-sialyltransferase 4               | Hemostasis, inflammation                | 34854163(-)  |
| <i>Dcps</i>     | NM_027030             | Histidine triad protein member 5                                           | mRNA decapping                          | 34931998(-)  |
| <i>Tirap</i>    | NM_054096             | Toll-interleukin 1 receptor domain-containing adaptor protein              | Pulmonary defense                       | 34994360(-)  |
